# Supplementary material
Source: publisher site journal article supplement (https://www.spandidos-publications.com/3946/downloadSupplementary)

Figure S1. Gating strategy for intracellular cytokines of CD4<sup>+</sup> T cells in lamina propria of the large intestine. (A) Single cells were gated using FSC-A and FSC-H, and cells were gated based on size and granularity using FSC-A and SSC-A to determinate lymphocyte region. CD4<sup>+</sup> T cells were selected for further analysis. (B) Subsequently, CD4<sup>+</sup> T cells from the control group, acute and chronic stress groups was followed by examination of expression of IL-4<sup>+</sup>, TNF- $\alpha$ <sup>+</sup> and IL-10<sup>+</sup>.

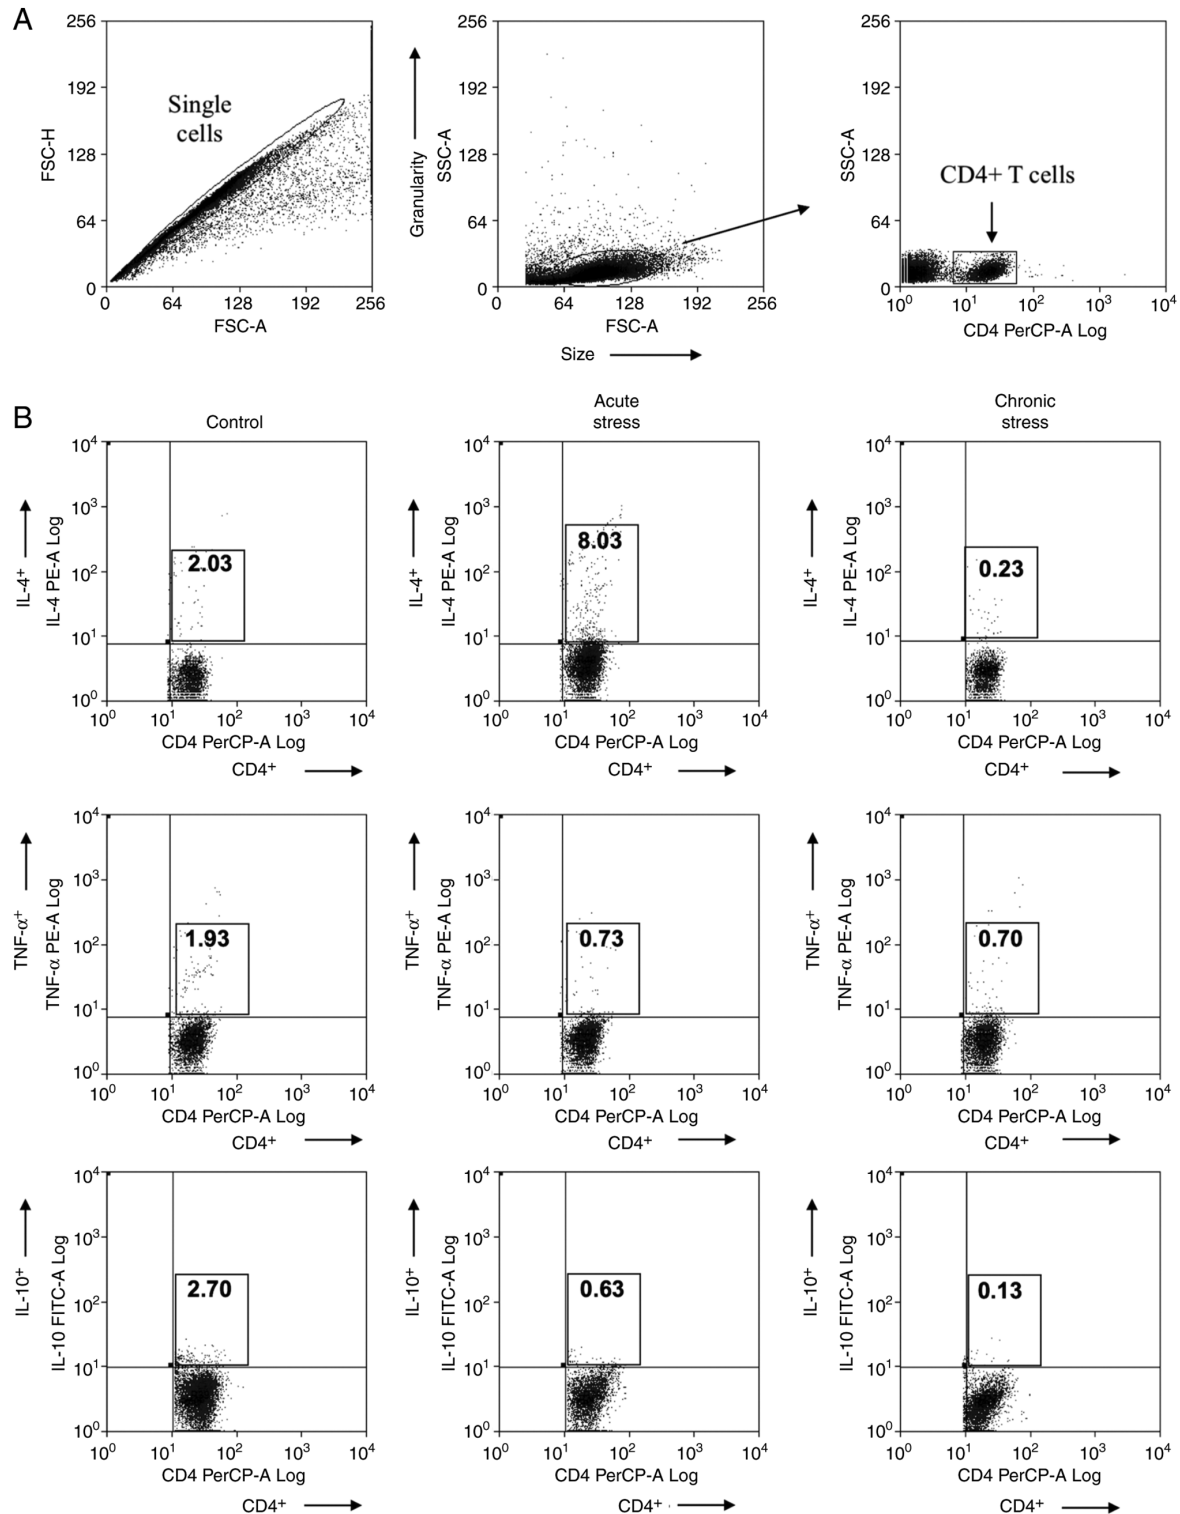

Supplement: Supplementary file 1 [file downloadSupplementary]
